# Supplementary material for: Plasma Bacterial DNA Load as a Potential Biomarker for the Early Detection of Colorectal Cancer: A Case–Control Study
Source: MDPI journal article supplement (doi:10.3390/microorganisms11092360), 2023-09-21
Supplement: s1 [file s1]

## Supplementary Materials

**Table S1.** Distribution of tumor parameters by tertiles of plasma Bacterial DNA in patients with CRC (n=50).

| Parameters *                     | Bacterial DNA Tertiles |            |            | p <sup>Ψ</sup>    |
|----------------------------------|------------------------|------------|------------|-------------------|
|                                  | 1                      | 2          | 3          |                   |
| Tumor site                       |                        |            |            | 0.19              |
| Ascending-Cecum                  | 4 (23.53)              | 4 (23.53)  | 2 (12.50)  |                   |
| Transverse                       | 3 (17.65)              | 0 (0.00)   | 2 (12.50)  |                   |
| Descending                       | 2 (11.76)              | 0 (0.00)   | 0 (0.00)   |                   |
| Sigmoid-Rectum                   | 8 (47.06)              | 13 (76.47) | 12 (75.00) |                   |
| Grade (%)                        |                        |            |            | 0.55              |
| G1                               | 0 (0.00)               | 0 (0.00)   | 2 (13.33)  |                   |
| G2                               | 8 (50.00)              | 9 (56.25)  | 7 (46.67)  |                   |
| G3                               | 8 (50.00)              | 7 (43.75)  | 6 (40.00)  |                   |
| Tumor Staging                    |                        |            |            | 0.16              |
| T1                               | 0 (0.00)               | 1 (6.25)   | 0 (0.00)   |                   |
| T2                               | 4 (23.53)              | 2 (12.50)  | 4 (28.57)  |                   |
| T3                               | 9 (52.94)              | 3 (18.75)  | 5 (35.71)  |                   |
| T4                               | 4 (23.53)              | 10 (62.50) | 5 (35.71)  |                   |
| MTD (cm)                         | 4.50±1.79              | 3.99±1.20  | 3.53±1.38  | 0.20 <sup>^</sup> |
| Endolymphatic Invasion (Yes) (%) | 11 (68.75)             | 13 (81.25) | 11 (73.33) | 0.77              |
| Ulceration (Yes) (%)             | 16 (94.12)             | 14 (93.33) | 13 (86.67) | 0.83              |

<sup>Ψ</sup> Fisher's test, <sup>^</sup> Kruskal-Wallis rank test.
